# Supplementary material for: Suppression of the polysulfide-shuttle behavior in Li–S batteries through the development of a facile functional group on the polypropylene separator
Source: Royal Society of Chemistry journal article supplement (doi:10.1039/c6mh00043f), 2016-01-01
Supplement: c6mh00043f1.pdf [file c6mh00043f1.pdf]

## ***Supplementary Information***

for *Materials Horizons*, DOI: 10.1039/ ((please add manuscript number))

**Suppression of the polysulfide-shuttle behavior in Li-S batteries through the development of a facile functional group on the polypropylene separator**

*Xingwen Yu, Jorphin Joseph, and Arumugam Manthiram\**

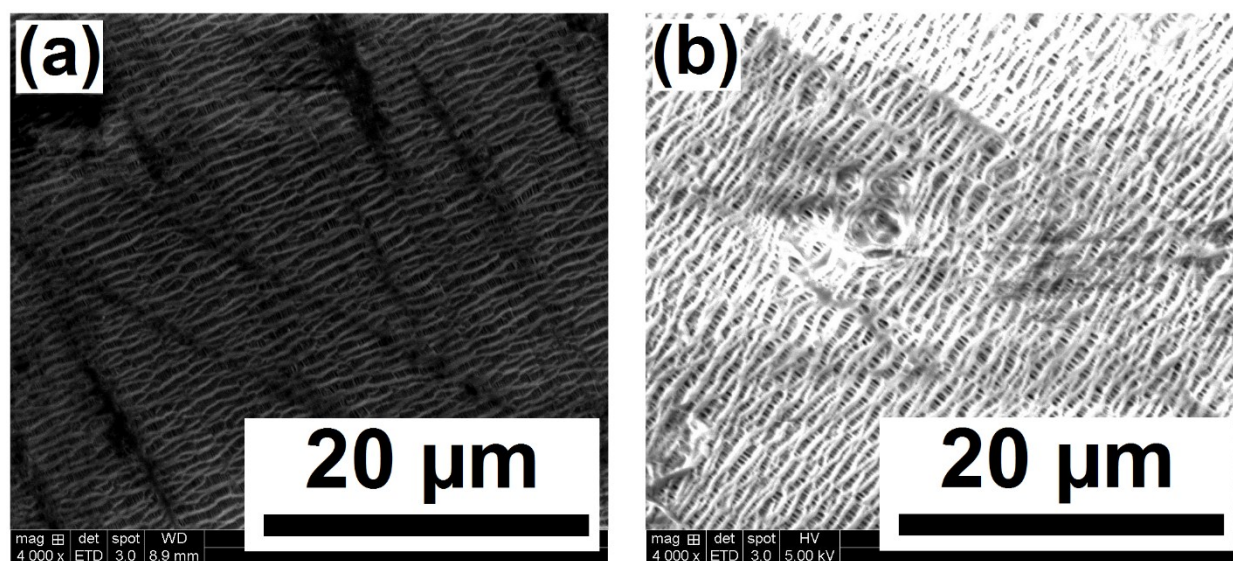

**Fig. S1.** Scanning electron microscope (SEM) images of a fresh polypropylene (PP) Celgard membrane (a) and a modified (b) PP membrane.

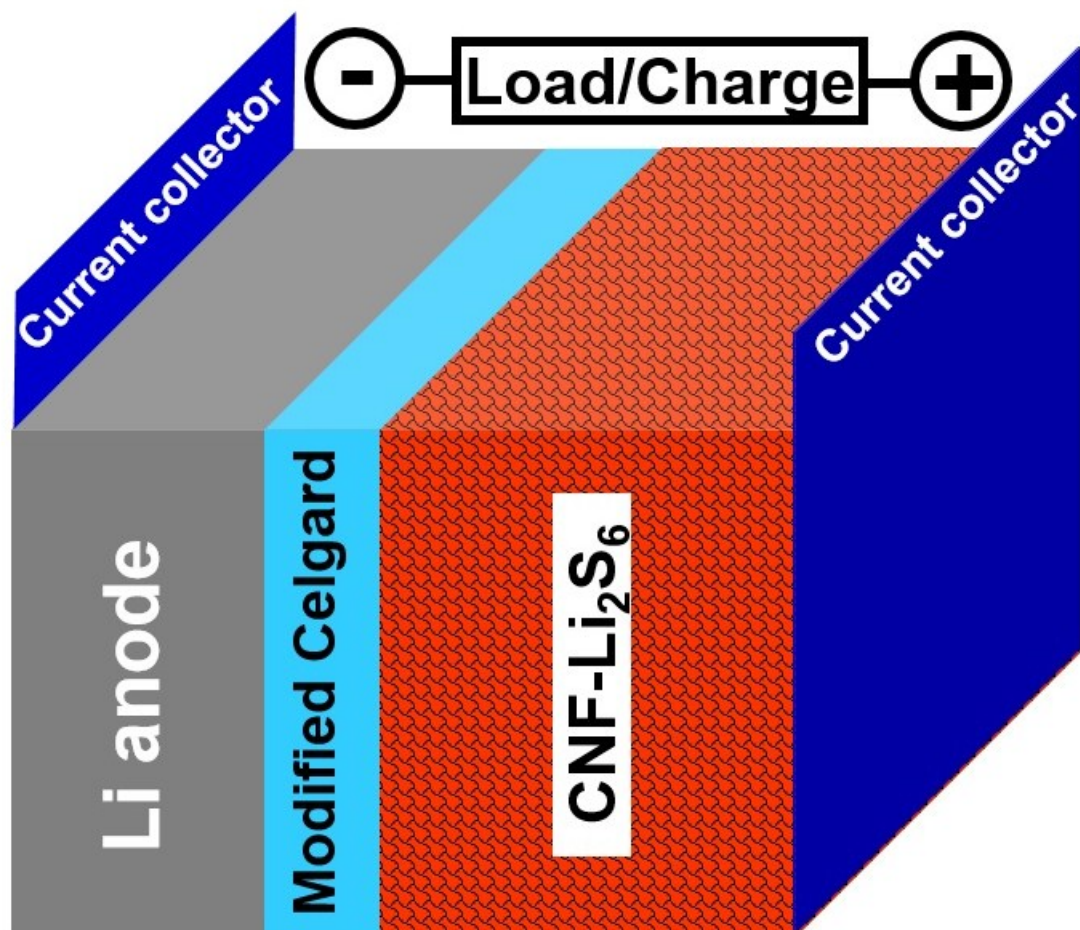

**Fig. S2.** Schematic of a Li || Mod-Celgard || Li-PS cell prepared with a Li-metal anode, a dissolved Li-polysulfide (Li-PS) cathode, a liquid electrolyte, and the modified Celgard separator. The Li-polysulfide cathode was prepared by dispersing the liquid Li-polysulfide catholyte into a carbon nanofiber (CNF) paper electrode.

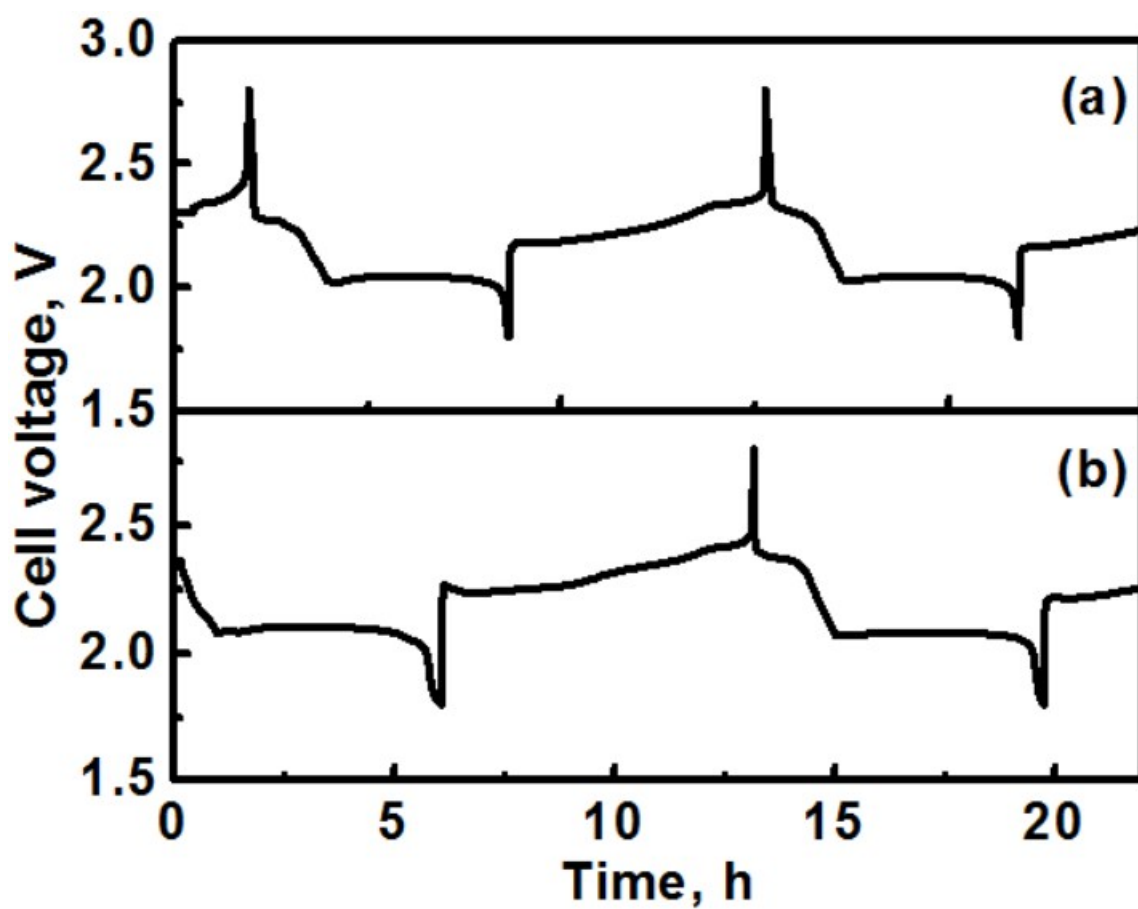

**Fig. S3.** Voltage profiles of the Li || Mod-Celgard || Li-PS cells during the first two representative cycles at C/10 rate. The cells were, respectively, first charged (a) or first discharged (b).
